# Supplementary material for: Assessment of functional alternatives to fluorinated foam blowing agents in insulation materials
Source: Royal Society of Chemistry journal article supplement (doi:10.1039/d5su00751h), 2025-12-16
Supplement: d5su00751h4.pdf [file d5su00751h4.pdf]

# Supplementary information to: Assessment of functional alternatives to fluorinated foam blowing agents in insulation materials

Romain Figuière<sup>\*1</sup>, Olivier Kirik<sup>1</sup>, Rahul Aggarwal<sup>2</sup>, Gregory Peters<sup>2</sup>, Ian Cousins<sup>1</sup>

<sup>\*</sup>: Corresponding author – romain.figuiere@aces.su.se

<sup>1</sup>: Department of Environmental Science, Stockholm University, SE-10691 Stockholm, Sweden

<sup>2</sup>: Environmental Systems Analysis, Chalmers University of Technology, Vera Sandbergs Allé 8, 41296 Gothenburg, Sweden

## Summary

Number of pages: 10

Number of Tables: 32 (All are provided in the separate Excel file named “*Supplementary data*”)

Number of Figures: 1

## Contents

|                                                                                                                            |     |
|----------------------------------------------------------------------------------------------------------------------------|-----|
| Table of Figures .....                                                                                                     | S2  |
| Table of Tables .....                                                                                                      | S2  |
| SI 1: Background information on MCDA methods .....                                                                         | S3  |
| SI 2: Identification of the substances to be substituted and potential functional alternatives .....                       | S5  |
| SI 3: Background information on the collection of the life cycle impact assessment (LCIA) data .....                       | S5  |
| SI 4: Shortlisting of potential alternatives and collection of data for evaluation .....                                   | S10 |
| SI 5: Performance matrices for the baseline scenario .....                                                                 | S11 |
| SI 6: MAUT models for the baseline scenarios .....                                                                         | S11 |
| SI 7: MAUT models for the no compensation scenarios .....                                                                  | S12 |
| SI 8: MAUT models for the sequential decision-making scenario, by considering technical performance attributes first ..... | S12 |
| SI 9: MAUT models for the sequential decision-making scenario, by considering sustainability attributes first .....        | S13 |
| References .....                                                                                                           | S13 |

## 35 **Table of Figures**

|    |                                                                                                                           |     |
|----|---------------------------------------------------------------------------------------------------------------------------|-----|
| 36 | Figure SI 1.1. Overview of the MAUT method.....                                                                           | S4  |
| 37 | Figure SI 1 2 Categorization of the criteria for evaluation of the identified alternatives.....                           | S5  |
| 38 | Figure SI 6 1 Effect of log-transformation of the raw data on the distribution of the normalised data for the ozone layer |     |
| 39 | depletion potential (A) and the ecotoxicity (B) criteria.....                                                             | S13 |

## 40 **Table of Tables**

41 *Note: In order to save space in this document, the tables listed below are accessible in the separate*  
42 *Excel file named “Supplementary data”*

|    |                                                                                                          |     |
|----|----------------------------------------------------------------------------------------------------------|-----|
| 43 | Table SI 2. Description of substances to be substituted and identified potential functional alternative. | S5  |
| 44 | Table SI 3. Selected life cycle impact categories.....                                                   | S8  |
| 45 | Table SI 4.1. Potential functional alternatives shortlisted for further evaluation.....                  | S10 |
| 46 | Table SI 4.2. Data related to the technical performance of insulation materials.....                     | S10 |
| 47 | Table SI 4.3. Life cycle assessment results for the insulation materials.....                            | S10 |
| 48 | Table SI 4.4.A. Life cycle impacts of the shortlisted alternatives - Neutral approach .....              | S11 |
| 49 | Table SI 4.4.B. Life cycle impacts of the shortlisted alternatives - Optimistic approach.....            | S11 |
| 50 | Table SI 4.4.C. Life cycle impacts of the shortlisted alternatives - Pessimistic approach.....           | S11 |
| 51 | Table SI 5.1. Performance matrix for the baseline scenario - Neutral approach .....                      | S11 |
| 52 | Table SI 5.2. Performance matrix for the baseline scenario - Optimistic approach.....                    | S11 |
| 53 | Table SI 5.3. Performance matrix for the baseline scenario - Pessimistic approach.....                   | S11 |
| 54 | Table SI 6.1.A. MAUT model with raw data for the baseline scenario - Neutral approach.....               | S11 |
| 55 | Table SI 6.1.B. MAUT model with raw data for the baseline scenario - Optimistic approach.....            | S11 |
| 56 | Table SI 6.1.C. MAUT model with raw data for the baseline scenario - Pessimistic approach.....           | S11 |
| 57 | Table SI 6.2.A. MAUT model with transformed data for the baseline scenario - Neutral approach....        | S13 |
| 58 | Table SI 6.2.B. MAUT model with transformed data for the baseline scenario - Optimistic                  |     |
| 59 | approach.....                                                                                            | S13 |
| 60 | Table SI 6.2.C. MAUT model with transformed data for the baseline scenario - Pessimistic                 |     |
| 61 | approach.....                                                                                            | S13 |
| 62 | Table SI 7.1. MAUT model for the no compensation scenario - Neutral approach.....                        | S14 |
| 63 | Table SI 7.2. MAUT model for the no compensation scenario - Optimistic approach.....                     | S14 |
| 64 | Table SI 7.3. MAUT model for the no compensation scenario - Pessimistic approach.....                    | S14 |
| 65 | Table SI 8.1. MAUT model for the sequential scenario - Performance ranking for the neutral               |     |
| 66 | approach.....                                                                                            | S14 |
| 67 | Table SI 8.2. MAUT model for the sequential scenario - Performance ranking for the optimistic            |     |
| 68 | approach.....                                                                                            | S14 |
| 69 | Table SI 8.3. MAUT model for the sequential scenario - Performance ranking for the pessimistic           |     |
| 70 | approach.....                                                                                            | S14 |
| 71 | Table SI 8.4. MAUT model for the sequential scenario - Final ranking for the neutral approach.....       | S14 |
| 72 | Table SI 8.5. MAUT model for the sequential scenario - Final ranking for the optimistic Scenario....     | S14 |
| 73 | Table SI 8.6. MAUT model for the sequential scenario - Final ranking for the pessimistic Scenario..      | S14 |
| 74 | Table SI 9.1. MAUT model for the sequential scenario - Sustainability ranking for the neutral            |     |
| 75 | approach.....                                                                                            | S14 |
| 76 | Table SI 9.2. MAUT model for the sequential scenario - Sustainability ranking for the optimistic         |     |
| 77 | approach.....                                                                                            | S15 |
| 78 | Table SI 9.3. MAUT model for the sequential scenario - Sustainability ranking for the pessimistic        |     |
| 79 | approach.....                                                                                            | S15 |
| 80 | Table SI 9.4. MAUT model for the sequential scenario - Final ranking for the neutral approach.....       | S15 |
| 81 | Table SI 9.5. MAUT model for the sequential scenario - Final ranking for the optimistic approach...      | S15 |
| 82 | Table SI 9.6. MAUT model for the sequential scenario - Final ranking for the pessimistic                 |     |
| 83 | approach.....                                                                                            | S15 |

84  
85

## 86 **SI 1: Background information on MCDA methods**

87 Multi-criteria decision analysis (MCDA) methods were developed to guide and help decision makers  
88 to achieve multiple, and usually conflicting, objectives. These methods can be classified in two main  
89 categories<sup>1</sup>:

- 90 - Full aggregation approaches
- 91 - Outranking approaches

### 92 *Full aggregation approaches*

93 In the full aggregation approaches aim to rank different options to solve a problem based on a predefined  
94 set of criteria. The options are ranked based on a single score calculated according to the performance  
95 of the option in each criterion being considered. In those approaches, compensation between the criteria  
96 being evaluated is made possible. The multi attribute utility theory (MAUT) method is one of the most  
97 common full aggregation approaches. This method assumes that the decision maker is trying to optimize  
98 a function which aggregates all their preferences. These preferences are represented by a utility function  
99 which measures the desirability of each option (or alternative) for each criterion being considered<sup>1</sup>.

100 In short, the utility function is used to transform the data used to evaluate the different alternatives  
101 according to the set of criteria into a dimensionless scale from 0 to 1 (Figure S1.1). 0 represents the  
102 least favored outcome of the criterion, while 1 represents the best possible outcome. An aggregation  
103 function is then used to calculate a final score for each alternative being evaluated. The aggregation  
104 function can translate the preferences of the decision makers for certain criteria compared to the other,  
105 for example by increasing their weight in the calculation. This final score is used to rank the alternatives  
106 and to identify the best option<sup>1-3</sup>.

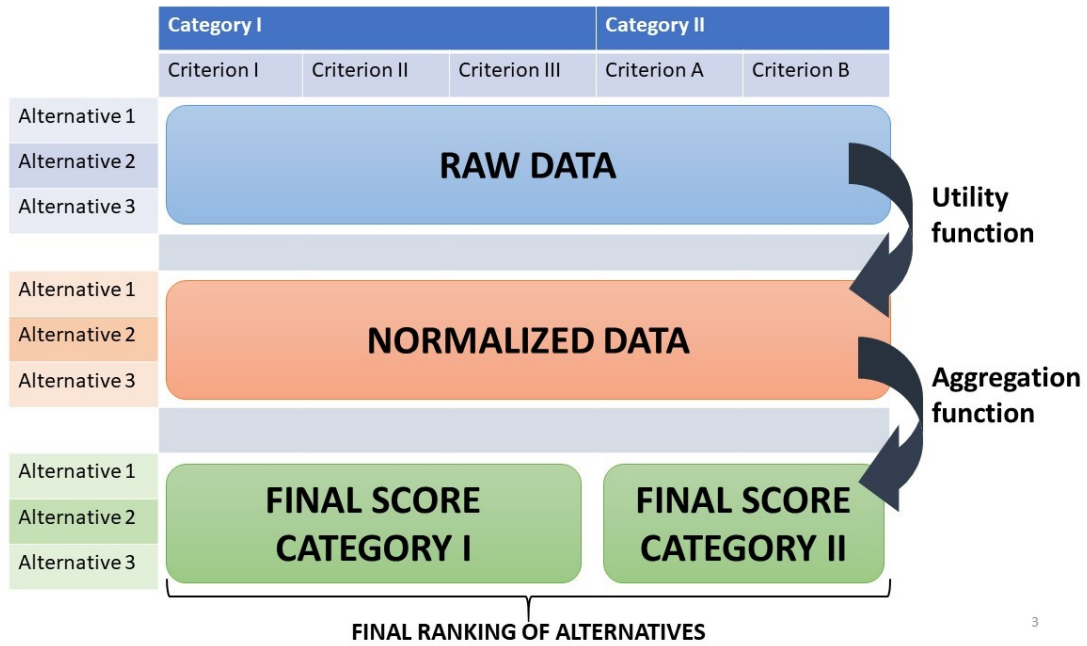

107

108 *Figure SI 1.1. Overview of the MAUT method*

109 Analytical hierarchy and analytical network processes are other full aggregation approaches commonly  
 110 used. In short, those processes are similar to the MAUT method except that the decision maker does  
 111 not need to determine a utility function beforehand<sup>1</sup>.

#### 112 *Outranking approaches<sup>1</sup>*

113 Outranking approaches are based on a pair-wise comparison of the alternatives for each criterion. In  
 114 other words, the alternatives are compared two-by-two for each criterion. In those methods, the decision  
 115 makers must set indifference, preference and veto thresholds which are meant to reflect how much an  
 116 option is preferred than another in a given criterion. In those approaches, no compensation between the  
 117 criteria being evaluated is possible. As a consequence, the comparison between two alternatives might  
 118 become too difficult as they have profile too different: one alternative might be preferred based on one  
 119 set of criteria, while the other is preferred on a second set of criteria. As a consequence, a complete  
 120 ranking of the different alternatives might not be always possible. The Preference Ranking Organization  
 121 METHod for Enriched Evaluation (PROMETHEE), and the *EL*imination *Et* Choix Traduisant la  
 122 *RÉ*alité (ELECTRE) (translated into elimination and choice exoressing reality) are two outranking  
 123 methods commonly used<sup>1,3-6</sup>.

#### 124 *Approach of this study*

125 In this study, alternatives were compared by following the MAUT approach based on their technical  
 126 performance and environmental impacts attributes. Given the high number of criteria identified for  
 127 evaluation in each attribute (i.e., performance, and environmental impacts), they were gathered in  
 128 different criteria categories, as illustrated below (Figure SI 1.2).

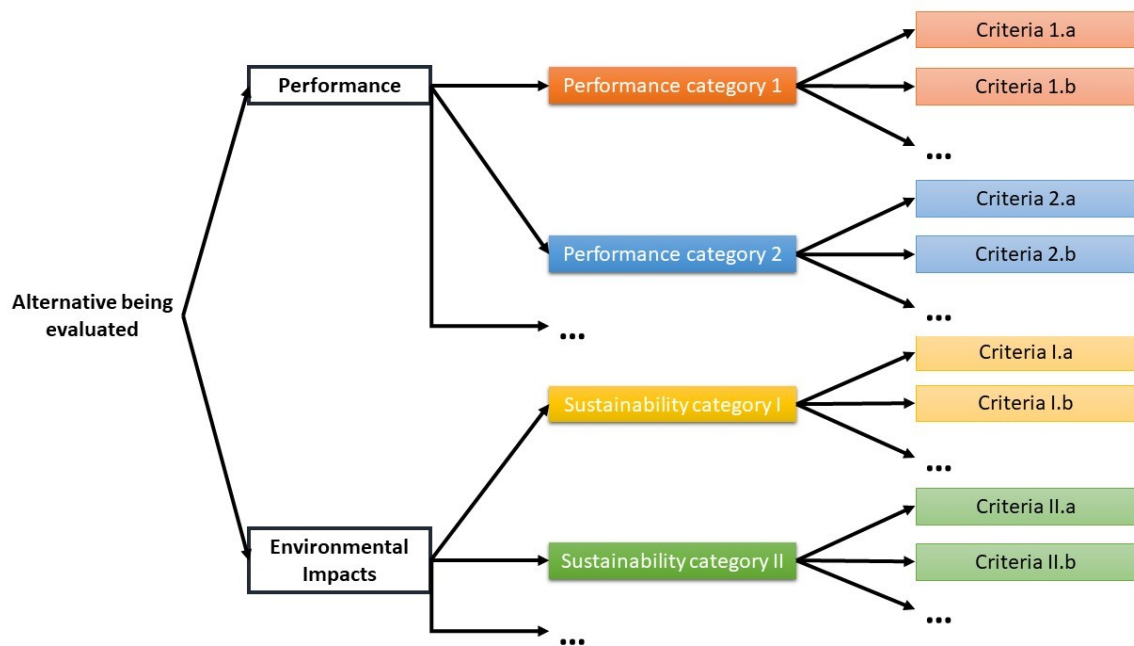

129

130 *Figure SI 1 2 Categorization of the criteria for evaluation of the identified alternatives*

## 131 **SI 2: Identification of the substances to be substituted and potential** 132 **functional alternatives**

133 The Table SI 2 presents the information collected from the ZeroPM database to identify the substances  
134 of concern and the potential functional alternatives<sup>7</sup>. The list of potential functional alternatives was  
135 completed with the information collected from a previous literature review on insulation materials<sup>8</sup>.

136 *Table SI 2. Description of substances to be substituted and identified potential functional alternatives*

## 137 **SI 3: Background information on the collection of the life cycle impact** 138 **assessment (LCIA) data**

139 Thermal insulation materials offer environmental benefits by reducing energy consumption for heating  
140 and cooling, thus cutting down energy demand during the use phase of a building (Bhandari et al., 2016;  
141 Biswas et al., 2016; Braulio-Gonzalo & Bovea, 2017; Petrosyan, 2019). However, these materials can  
142 also present environmental and health concerns, particularly through resource extraction, production  
143 processes, and end-of-life disposal along with indoor air emissions (Balo & Sua, 2023; Biswas et al.,  
144 2016; Foti et al., 2023; Gadallah & Aboulnaga, 2020; Naldzhiev et al., 2020; Velichko et al., 2017; Wi  
145 et al., 2021). This study included the environmental impacts of different insulation materials, focusing  
146 not on their energy-saving benefits in use phase but on comparing alternative materials in production  
147 phase to identify the option with the lowest potential environmental impact. Life Cycle Assessment  
148 (LCA) is an established methodology for assessing the environmental footprint of products and  
149 processes (Baumann & Tillman, 2004; Hauschild, 2018; ISO, 2006a, 2006b). This approach considers

150 a product's life cycle encompassing all associated inputs and outputs. LCA is increasingly utilized to  
151 quantify the potential environmental impacts of products, including thermal insulation materials, to  
152 inform sustainable material choices. There is a substantial body of literature on LCA applications for  
153 insulation materials, reflecting the field's focus on both improving energy efficiency and reducing  
154 environmental impacts. This study contributes to that body of knowledge by examining thermal  
155 insulation options to determine the most environmentally favorable choice, supporting decision-  
156 making.

157 This study covers a variety of thermal insulation materials, each with distinct environmental profiles,  
158 including fibreglass, expanded polystyrene (EPS), extruded polystyrene (XPS), polyurethane, cellulose,  
159 hemp, cork, wood fibre, and sheep wool. Several comprehensive literature reviews have explored the  
160 environmental impacts of these materials. Notably, Füchsl et al. (2022) provide an in-depth review of  
161 the environmental profiles of traditional and bio-based insulation materials, while Schiavoni et al.  
162 (2016) investigate the different insulation options, focusing on their environmental impact and technical  
163 performance offering valuable insights into the advantages and drawbacks of each material.

164 Fibreglass is a widely studied insulating material for its high insulation efficiency. It is discussed in the  
165 context of environmental impacts in studies such as Ardente et al. (2008); Arellano-Vazquez et al.  
166 (2020); Asdrubali et al. (2015); Carabaño et al. (2017); Casas-Ledón et al. (2020); Colli et al. (2020);  
167 Cozzarini et al. (2020); Dickson and Pavía (2021); Kadziński et al. (2018); Mattoni et al. (2019);  
168 Ricciardi et al. (2014); Sierra-Pérez et al. (2016); Zhao et al. (2018). These studies evaluate the lifecycle  
169 impact of fibreglass, particularly its energy consumption during production, emissions, and disposal  
170 challenges. Known for its durability and fire resistance, rock wool is another popular insulation  
171 material. Research by Ardente et al. (2008); Arellano-Vazquez et al. (2020); Asdrubali et al. (2016);  
172 Casas-Ledón et al. (2020); Čekon et al. (2017); Cozzarini et al. (2020); de la Hera et al. (2017); Densley  
173 Tingley et al. (2015); Dickson and Pavía (2021); Ingrao et al. (2014); Intini and Kühtz (2011); Kadziński  
174 et al. (2018); Ma et al. (2014); Mattoni et al. (2019); Papadopoulos and Giama (2007); Ricciardi et al.  
175 (2014); Sierra-Pérez et al. (2016); Struhala et al. (2016); Zabalza Bribián et al. (2011); Zampori et al.  
176 (2013) focuses on rock wool's environmental impacts. Studies by Arellano-Vazquez et al. (2020);  
177 Asdrubali et al. (2016); Biswas et al. (2016); Casas-Ledón et al. (2020); Čekon et al. (2017); Colli et al.  
178 (2020); Cozzarini et al. (2020); Densley Tingley et al. (2015); Gomes et al. (2020); Ingrao et al. (2014);  
179 Intini and Kühtz (2011); Kadziński et al. (2018); Mattoni et al. (2019); Pargana et al. (2014); Ricciardi  
180 et al. (2014); Struhala et al. (2016); Usubharatana and Phungrassami (2019); Zabalza Bribián et al.  
181 (2011) discuss Expanded Polystyrene (EPS) environmental concerns. Extruded Polystyrene (XPS) is  
182 frequently studied for its high insulation performance and environmental challenges during production.  
183 Research by Antoniadou et al. (2015); Arellano-Vazquez et al. (2020); Asdrubali et al. (2016); Biswas  
184 et al. (2016); Carabaño et al. (2017); Casas-Ledón et al. (2020); Colli et al. (2020); Ma et al. (2014);  
185 Papadopoulos and Giama (2007); Pargana et al. (2014); Ricciardi et al. (2014); Sierra-Pérez et al.

186 (2016); Usubharatana and Phungrassami (2019); Židonienė and Kruopienė (2015) evaluates the  
187 lifecycle impacts of XPS, including greenhouse gas emissions and energy consumption. Studies by  
188 Ardente et al. (2008); Colli et al. (2020); Cozzarini et al. (2020); Intini and Kühtz (2011); Kadziński et  
189 al. (2018); Ma et al. (2014); Marconi et al. (2020); Pargana et al. (2014); Sierra-Pérez et al. (2016);  
190 Usubharatana and Phungrassami (2019); Zabalza Bribián et al. (2011) highlight polyurethane's  
191 environmental impacts. Cellulose is considered a sustainable option due to its use of recycled materials.  
192 Studies by Ardente et al. (2008); Asdrubali et al. (2016); Buratti et al. (2018); Casas-Ledón et al. (2020);  
193 Colli et al. (2020); Dickson and Pavía (2021); Mattoni et al. (2019); Ricciardi et al. (2014); Zabalza  
194 Bribián et al. (2011) reviewed cellulose's potential as an environmentally friendly insulation material.  
195 A bio-based insulation material, hemp is reviewed in studies by Arrigoni et al. (2016); Arrigoni et al.  
196 (2017); Colli et al. (2020); Dickson and Pavía (2021); Kadziński et al. (2018); Sinka et al. (2018);  
197 Zampori et al. (2013). These studies discuss hemp's renewable properties, environmental impact, and  
198 potential as a sustainable alternative in construction, particularly due to its lower embodied energy and  
199 carbon sequestration benefits. Cork insulation is praised for its renewable and biodegradable properties.  
200 Asdrubali et al. (2016); Buratti et al. (2018); Carabaño et al. (2017); Demertzi et al. (2017); Dickson  
201 and Pavía (2021); Ingrao et al. (2014); Kadziński et al. (2018); Pargana et al. (2014); Ricciardi et al.  
202 (2014); Sierra-Pérez et al. (2016); Silvestre et al. (2016); Zabalza Bribián et al. (2011) discuss cork's  
203 life cycle environmental impact. Wood fibre insulation is reviewed for its sustainability,  
204 biodegradability, and carbon sequestration potential. Studies by Nakano et al. (2018); Rocchi et al.  
205 (2018); Yildirim (2018) discuss wood fibre's environmental impacts. Dickson and Pavía (2021) examine  
206 the use of sheep wool as an insulation material, noting its energy performance and environmental  
207 impact.

208 Each of these insulation materials presents different environmental considerations and benefits, and the  
209 cited literature provides comprehensive assessments of their life cycles impacts. By analyzing these  
210 materials, this study aims to identify insulation options that minimize environmental impacts.

211 In this study, the LCA impacts are calculated based on the functional unit of providing a thermal  
212 resistance of 1 R over a 1 square meter area. The material's thermal conductivity and density are used  
213 to determine the reference flow, which is the amount of insulation material necessary (in kilograms) to  
214 meet this functional requirement. This LCA follows a cradle-to-gate approach, focusing only on the  
215 potential environmental impacts of producing the insulating material, including all production-related  
216 emissions and waste. However, waste generated during the material's use phase is not included,  
217 representing one of the study's limitations, as different materials might produce varying amounts of  
218 waste in real-life applications.

219 The geographical scope of the impact assessment is both global and European, utilizing data from  
220 Ecoinvent 3.9 with a cutoff methodology (Ecoinvent, 2024). This data set includes market data, which

also accounts for transportation impacts. One of the key assumptions in this study is that the insulation materials under evaluation are equivalent in fulfilling the thermal resistance requirement over their design life without needing replacement. While different materials may have different lifespans, this study does not consider scenarios where a material might need replacement if it fails before the end of the application design life.

The study also does not factor in end-of-life impacts. The disposal processes for insulation materials such as landfilling, recycling, incineration, and incineration with energy recovery could vary in their environmental impacts. Materials requiring disposal in hazardous waste landfills or incineration facilities due to the presence of toxic substances, like flame retardants, would likely have a higher end-of-life impact than those disposed of through conventional means. However, these aspects are beyond the scope of this study. Based on the functional unit, the total reference flow for each material is calculated, and from this, the cradle-to-gate LCA impacts are determined for comparative analysis.

The impacts are calculated using the Product Environmental Footprint (PEF) recommended life cycle impact assessment method EFv3.1 EN15804 along with IPCC 2021 to evaluate the potential environmental impacts, as shown in Table SI 3 (European Commission, 2023; IPCC, 2023). In total, different impact indicators were selected to compare the materials. Among these indicators, special emphasis was placed on climate change impacts, given that toxicity impacts are assessed in other criteria of the comparison. These sustainability impact categories are pivotal in the overall analysis, highlighting the importance of environmental criteria alongside other criteria.

*Table SI 3. Selected life cycle impact categories*

## References for LCIA data collection

- Antoniadou, P., Giama, E., Boemi, S. N., Karlessi, T., Santamouris, M., & Papadopoulos, A. M. (2015). Integrated evaluation of the performance of composite cool thermal insulation materials. *Energy Procedia*, 243  
Ardente, F., Beccali, M., Cellura, M., & Mistretta, M. (2008). Building energy performance: A LCA case study of kenaf-fibres insulation board. *Energy and Buildings*, 40(1), 1-10. <https://doi.org/10.1016/j.enbuild.2006.12.009>  
Arellano-Vazquez, D. A., Moreschi, L., Del Borghi, A., Gallo, M., Valverde, G. I., Rojas, M. M., Romero-Salazar, L., & Arteaga-Arcos, J. C. (2020). Use of EPD system for designing new building materials: The case study of a bio-based thermal insulation panel from the pineapple industry by-product. *Sustainability (Switzerland)*, 12(17), Article 6864. <https://doi.org/10.3390/SU12176864>  
Arrigoni, A., Pelosato, R., & Dotelli, G. (2016). 650-659.  
Arrigoni, A., Pelosato, R., Melià, P., Ruggieri, G., Sabbadini, S., & Dotelli, G. (2017). Life cycle assessment of natural building materials: the role of carbonation, mixture components and transport in the environmental impacts of hemperete blocks. *Journal of Cleaner Production*, 149, 1051-1061. <https://doi.org/10.1016/j.jclepro.2017.02.161>  
Asdrubali, F., D'Alessandro, F., & Schiavoni, S. (2015). A review of unconventional sustainable building insulation materials. *Sustainable Materials and Technologies*, 4, 1-17. <https://doi.org/10.1016/j.susmat.2015.05.002>  
Asdrubali, F., Pisello, A. L., D'Alessandro, F., Bianchi, F., Fabiani, C., Cornicchia, M., & Rotili, A. (2016). Experimental and numerical characterization of innovative cardboard based panels: Thermal and acoustic performance analysis and life cycle assessment. *Building and Environment*, 95, 145-159. <https://doi.org/10.1016/j.buildenv.2015.09.003>  
Balo, F., & Sua, L. S. (2023). Strategic Evaluation and Selection for Energy-Effective Natural Fibres as Alternative Sustainable Insulation Materials for Green Building Envelope. In *Handbook of Sustainable Materials: Modelling, Characterization, and Optimization* (pp. 1-17). <https://doi.org/10.1201/9781003297772-1>  
Baumann, H., & Tillman, A.-M. (2004). *The Hitch Hiker's Guide to LCA: An Orientation in Life Cycle Assessment Methodology and Application*. Professional Publishing House. <https://books.google.se/books?id=3QdsQgAACAAJ>



Bhandari, M., Biswas, K., Shrestha, S., & Desjarlais, A. (2016). A simplified energy savings calculation tool for the lifetime energy and environmental impact assessment of insulation materials. *Thermal Performance of the Exterior Envelopes of Whole Buildings*, 265-269. <https://doi.org/10.1016/j.enbuild.2015.12.013>

Biswas, K., Shrestha, S. S., Bhandari, M. S., & Desjarlais, A. O. (2016). Insulation materials for commercial buildings in North America: An assessment of lifetime energy and environmental impacts. *Energy and Buildings*, 112, 256-269. <https://doi.org/10.1016/j.enbuild.2015.12.013>

Braulio-Gonzalo, M., & Bovea, M. D. (2017). Environmental and cost performance of building's envelope insulation materials to reduce energy demand: Thickness optimisation. *Energy and Buildings*, 150, 527-545. <https://doi.org/10.1016/j.enbuild.2017.06.005>

Buratti, C., Belloni, E., Lascaro, E., Merli, F., & Ricciardi, P. (2018). Rice husk panels for building applications: Thermal, acoustic and environmental characterization and comparison with other innovative recycled waste materials. *Construction and Building Materials*, 171, 338-349. <https://doi.org/10.1016/j.conbuildmat.2018.03.089>

Carabaño, R., Hernando, S. M., Ruiz, D., & Bedoya, C. (2017). Life cycle assessment (LCA) of building materials for the evaluation of building sustainability: The case of thermal insulation materials. *Revista de la Construcción*, 16(1), 22-32. <https://doi.org/10.7764/RDLC.16.1.22>

Casas-Ledón, Y., Daza Salgado, K., Cea, J., Arteaga-Pérez, L. E., & Fuentealba, C. (2020). Life cycle assessment of innovative insulation panels based on eucalyptus bark fibres. *Journal of Cleaner Production*, 249, Article 119356. <https://doi.org/10.1016/j.jclepro.2019.119356>

Čekon, M., Struhala, K., & Slávik, R. (2017). Cardboard-Based Packaging Materials as Renewable Thermal Insulation of Buildings: Thermal and Life-Cycle Performance. *Journal of Renewable Materials*, 5, 84-93. <https://doi.org/10.7569/JRM.2017.634135>

Colli, C., Bataille, A., & Antezak, E. (2020). Investigating eco-efficiency procedure to compare refurbishment scenarios with different insulating materials. *Procedia CIRP*, 2020, 1-6. <https://doi.org/10.1016/j.procir.2020.03.005>

Cozzarini, L., Marsich, L., Ferluga, A., & Schmid, C. (2020). Life cycle analysis of a novel thermal insulator obtained from recycled glass waste. *Developments in the Built Environment*, 3, Article 100014. <https://doi.org/10.1016/j.dibe.2020.100014>

de la Hera, G., Muñoz-Díaz, I., Cifrian, E., Vitorica, R., Gutierrez San Martin, O., & Viguri, J. R. (2017). Comparative Environmental Life Cycle Analysis of Stone Wool Production Using Traditional and Alternative Materials. *Waste and Biomass Valorization*, 8(5), 1505-1520. <https://doi.org/10.1007/s12649-016-9660-8>

Demertzi, M., Sierra-Pérez, J., Paulo, J. A., Arroja, L., & Dias, A. C. (2017). Environmental performance of expanded cork slab and granules through life cycle assessment. *Journal of Cleaner Production*, 145, 294-302. <https://doi.org/10.1016/j.jclepro.2017.01.071>

Densley Tingley, D., Hathway, A., & Davison, B. (2015). An environmental impact comparison of external wall insulation types. *Building and Environment*, 85, 182-189. <https://doi.org/10.1016/j.buildenv.2014.11.021>

Dickson, T., & Pavia, S. (2021). Energy performance, environmental impact and cost of a range of insulation materials. *Renewable and Sustainable Energy Reviews*, 140, Article 110752. <https://doi.org/10.1016/j.rser.2021.110752>

Ecoinvent. (2024). *Database Ecoinvent (Version 3.9.1)* <https://ecoquery.ecoinvent.org/3.10/cutoff/search>

European Commission. (2023). *Developer Environmental Footprint (EF)*. <https://eplca.jrc.ec.europa.eu/LCDN/developerEF.xhtml>

Foti, D., Amiandamhen, S. O., Fernando, D., Letoffe, A., & Adamopoulou, S. (2023). Heat Treatment's Effect on Properties of Polystyrene from Building Demolitions [Article]. *BioResources*, 18(3), 5623-5634. <https://doi.org/10.15376/biores.18.3.5623-5634>

Füchsl, S., Rheude, F., & Röder, H. (2022). Life cycle assessment (LCA) of thermal insulation materials: A critical review. *Cleaner Materials*, 5, 100119. <https://doi.org/10.1016/j.clema.2022.100119>

Gadallah, S., & Aboulnaga, M. (2020). Climate action and sdgs' attainment: Insulation materials' impacts assessment [Article]. *Sustainable Mediterranean Construction*, 2020(11), 76-80. <https://www.scopus.com/inward/record.uri?eid=2-s2.0-85108677168&partnerID=40&md5=959881e4ae2d10fcd1f4d785aedaa937>

Gomes, R., Silvestre, J. D., & Brito, J. (2020). Environmental life cycle assessment of the manufacture of EPS granulates, lightweight concrete with EPS and high-density EPS boards. *Journal of Building Engineering*, 28, Article 101031. <https://doi.org/10.1016/j.jobbe.2019.101031>

Hauschild, M. Z. (2018). Introduction to LCA Methodology. In M. Z. Hauschild, R. K. Rosenbaum, & S. I. Olsen (Eds.), *Life Cycle Assessment: Theory and Practice* (pp. 59-66). Springer International Publishing. [https://doi.org/10.1007/978-3-319-56475-3\\_6](https://doi.org/10.1007/978-3-319-56475-3_6)

Ingrao, C., Lo Giudice, A., Tricase, C., Rana, R., Mbohwa, C., & Siracusa, V. (2014). Recycled-PET fibre based panels for building thermal insulation: Environmental impact and improvement potential assessment for a greener production. *Science of the Total Environment*, 493, 914-929. <https://doi.org/10.1016/j.scitotenv.2014.06.022>

Intini, F., & Kühtz, S. (2011). Recycling in buildings: An LCA case study of a thermal insulation panel made of polyester fibre, recycled from post-consumer PET bottles. *International Journal of Life Cycle Assessment*, 16(4), 306-315. <https://doi.org/10.1007/s11367-011-0267-9>

IPCC. (2023). *Climate Change 2021: The Physical Science Basis*. <https://www.ipcc.ch/report/ar6/wg1/>

ISO. (2006a). ISO14040:2006. Environmental management - Life cycle assessment - Principles and framework. *International Organization for Standardization, ISO Central Secretariat*. <https://www.iso.org/standard/38498.html>

ISO. (2006b). ISO14044:2006. Environmental management - Life cycle assessment - Requirements and guidelines. *International Organization for Standardization, ISO Central Secretariat*. <https://www.iso.org/home.html>

Kadziński, M., Rocchi, L., Miebs, G., Grohmann, D., Menconi, M. E., & Paolotti, L. (2018). Multiple Criteria Assessment of Insulating Materials with a Group Decision Framework Incorporating Outranking Preference Model and

- Characteristic Class Profiles. *Group Decision and Negotiation*, 27(1), 33-59. <https://doi.org/10.1007/s10726-017-9549-3>
- Ma, L. P., Jiang, Q., Zhao, P., & Zhao, C. Z. (2014). Comparative study on life cycle assessment for typical building thermal insulation materials in China. In *Materials Science Forum* (Vol. 787, pp. 176-183).
- Marconi, M., Barbanera, M., Calabrò, G., & Baffo, I. (2020). Reuse of leather scraps for insulation panels: Technical and environmental feasibility evaluation. *Procedia CIRP*,
- Mattoni, B., Bisegna, F., Evangelisti, L., Guattari, C., & Asdrubali, F. (2019). Influence of LCA procedure on the green building rating tools outcomes. *IOP Conference Series: Materials Science and Engineering*,
- Nakano, K., Ando, K., Takigawa, M., & Hattori, N. (2018). Life cycle assessment of wood-based boards produced in Japan and impact of formaldehyde emissions during the use stage. *International Journal of Life Cycle Assessment*, 23(4), 957-969. <https://doi.org/10.1007/s11367-017-1343-6>
- Naldzhiev, D., Mumovic, D., & Strlic, M. (2020). Polyurethane insulation and household products – A systematic review of their impact on indoor environmental quality. *Building and Environment*, 169, 106559. <https://doi.org/https://doi.org/10.1016/j.buildenv.2019.106559>
- Papadopoulos, A. M., & Giama, E. (2007). Environmental performance evaluation of thermal insulation materials and its impact on the building. *Building and Environment*, 42(5), 2178-2187. <https://doi.org/10.1016/j.buildenv.2006.04.012>
- Pargana, N., Pinheiro, M. D., Silvestre, J. D., & De Brito, J. (2014). Comparative environmental life cycle assessment of thermal insulation materials of buildings. *Energy and Buildings*, 82, 466-481. <https://doi.org/10.1016/j.enbuild.2014.05.057>
- Petrosyan, A. L. (2019). Determination of optimal thermal insulation layer thickness of outer structures of buildings according to the load of heating and cooling system. *IOP Conference Series: Materials Science and Engineering*,
- Ricciardi, P., Belloni, E., & Cotana, F. (2014). Innovative panels with recycled materials: Thermal and acoustic performance and Life Cycle Assessment. *Applied Energy*, 134, 150-162. <https://doi.org/10.1016/j.apenergy.2014.07.112>
- Rocchi, L., Paolotti, L., Fagioli, F. F., & Boggia, A. (2018). Production of insulating panel from pruning remains: An economic and environmental analysis. *Energy Procedia*,
- Schiavoni, S., D'Alessandro, F., Bianchi, F., & Asdrubali, F. (2016). Insulation materials for the building sector: A review and comparative analysis. *Renewable and Sustainable Energy Reviews*, 62, 988-1011. <https://doi.org/10.1016/j.rser.2016.05.045>
- Sierra-Pérez, J., Boschmonart-Rives, J., Dias, A. C., & Gabarrell, X. (2016). Environmental implications of the use of agglomerated cork as thermal insulation in buildings. *Journal of Cleaner Production*, 126, 97-107. <https://doi.org/10.1016/j.jclepro.2016.02.146>
- Silvestre, J. D., Pargana, N., De Brito, J., Pinheiro, M. D., & Durão, V. (2016). Insulation cork boards-environmental life cycle assessment of an organic construction material. *Materials*, 9(5), Article 394. <https://doi.org/10.3390/ma9050394>
- Sinka, M., Van den Heede, P., De Belie, N., Bajare, D., Sahmenko, G., & Korjamins, A. (2018). Comparative life cycle assessment of magnesium binders as an alternative for hemp concrete. *Resources, Conservation and Recycling*, 133, 288-299. <https://doi.org/10.1016/j.resconrec.2018.02.024>
- Struhala, K., Stránská, Z., & Sedlák, J. (2016). LCA of fibre flax thermal insulation. *Applied Mechanics and Materials*, 824, 761-769.
- Usubharatana, P., & Phungrassami, H. (2019). Life cycle assessment of bio-based thermal insulation materials formed by different methods. *Environmental Engineering and Management Journal*, 18(7), 1471-1486. <https://doi.org/10.30638/eeemj.2019.138>
- Velichko, E., Tskhovrebov, E., & Shevchenko, A. (2017). Environmental safety providing during heat insulation works and using thermal insulation materials. *MATEC Web of Conferences*,
- Wi, S., Kang, Y., Yang, S., Kim, Y. U., & Kim, S. (2021). Hazard evaluation of indoor environment based on long-term pollutant emission characteristics of building insulation materials: An empirical study [Article]. *Environmental Pollution*, 285, Article 117223. <https://doi.org/10.1016/j.envpol.2021.117223>
- Yildirim, N. (2018). Life cycle assessment (LCA) of nanocellulose composite panels (NCPs) manufactured using freeze-drying technique. *Turk J. For.*, 5(1), 56-63.
- Zabalza Bribián, I., Valero Capilla, A., & Aranda Usón, A. (2011). Life cycle assessment of building materials: Comparative analysis of energy and environmental impacts and evaluation of the eco-efficiency improvement potential. *Building and Environment*, 46(5), 1133-1140. <https://doi.org/10.1016/j.buildenv.2010.12.002>
- Zampori, L., Dotelli, G., & Vernelli, V. (2013). Life cycle assessment of hemp cultivation and use of hemp-based thermal insulator materials in buildings. *Environmental Science and Technology*, 47(13), 7413-7420. <https://doi.org/10.1021/es401326a>
- Zhao, C. Z., Liu, Y., Ren, S. W., & Zhang, Y. J. (2018). Life cycle assessment of typical glass wool production in China. In *Materials Science Forum* (Vol. 913, pp. 998-1003).
- Židonienė, S., & Kruopienė, J. (2015). Life Cycle Assessment in environmental impact assessments of industrial projects: Towards the improvement. *Journal of Cleaner Production*, 106, 533-540. <https://doi.org/10.1016/j.jclepro.2014.07.081>

#### 394 **SI 4: Shortlisting of potential alternatives and collection of data for** 395 **evaluation**

396 Table SI 4.1 is listing the alternatives shortlisted for further evaluation. Tables SI 4.2 presents the  
397 collected data related to the technical performance the shortlisted alternatives, and Table SI 4.3 presents  
398 the characterization factors calculated for 1 kg of each shortlisted alternative, respectively.

399 *Table SI 4.1. Potential functional alternatives shortlisted for further evaluation*

400 *Table SI 4.2. Data related to the technical performance of insulation materials*

401 *Table SI 4.3. Characterization factors for 1 kg of the insulation materials*

402 The life cycle impacts of each shortlisted alternative were calculated by multiplying the characterization  
403 factors by the amount of materials (in kilograms) required to fulfil the defined functional unit, i.e. the  
404 insulation of an area of 1 m<sup>2</sup> with a thermal transmittance of 1 W/m<sup>2</sup>K. The amount of materials  
405 required could be calculated using the relationship between the thermal transmittance, the  
406 thickness and the thermal conductivity of the material (Equation 1), and the density of the  
407 material (Equation 2).

408 
$$\text{Thermal Transmittance} \left( \frac{W}{m^2 K} \right) = \frac{\text{Thermal conductivity} \left( \frac{W}{m K} \right)}{\text{Thickness (m)}}$$

409 *Equation 1: Relationship between thermal transmittance, thermal conductivity and thickness.*

410 
$$\text{Mass of materials (kg)} = \text{Density of materials} \left( \frac{kg}{m^3} \right) * \text{Area (m}^2\text{)} * \text{Thickness (m)}$$

411 *Equation 2: Calculation of the mass of materials based on the density of the material, the area, and the*  
412 *thickness*

413 As the values for the thermal conductivity and the density of the shortlisted alternatives varied according  
414 to the approach taken, the life cycle impacts used as input in the MAUT models changed. Tables SI  
415 4.4.A, SI 4.4.B, and SI 4.4.C present the mass of materials required to fulfil the functional unit, and the  
416 resulting life cycle impacts for each shortlisted alternative following the neutral approach, optimistic  
417 approach, and pessimistic approach, respectively.

418 *Table SI 4.4.A. Life cycle impacts of the shortlisted alternatives - Neutral approach*

419 *Table SI 4.4.B Life cycle impacts of the shortlisted alternative - Optimistic approach*

420 *Table SI 4.4.C Life cycle impacts of the shortlisted alternative - Pessimistic approach*

## **SI 5: Performance matrices for the baseline scenario**

Tables SI 5.1, SI 5.2, and SI 5.3 present the input data used for the baseline scenario following the neutral approach, optimistic approach, and pessimistic approach, respectively.

*Table SI 5.1 Performance matrix for the baseline scenario - Neutral approach*

*Table SI 5.2. Performance matrix for the baseline scenario - Optimistic approach*

*Table SI 5.3. Performance matrix for the baseline scenario - Pessimistic approach*

## **SI 6: MAUT models for the baseline scenarios**

Tables SI 6.1.A, SI 6.1.B, and SI 6.1.C present the MAUT models which based on raw input data for the baseline scenario following the neutral approach, optimistic approach, and pessimistic approach, respectively.

*Table SI 6.1.A. MAUT model with raw data for the baseline scenario - Neutral approach*

*Table SI 6.1.B. MAUT model with raw data for the baseline scenario - Optimistic approach*

*Table SI 6.1.C. MAUT model with raw data for the baseline scenario - Pessimistic approach*

For some criteria, the data for the different alternatives are distributed on a range of several order of magnitude (especially for environmental impacts criteria). When normalising the data, this results in alternatives being grouped with very little differences in normalised data. To ensure that the normalised data of the different alternatives are better distributed between 0 and 1, the input data was log-transformed before running the normalisation step. Figures SI 6.1.A and B illustrate the effect of the log-transformation of the raw data on the distribution of the normalised data for criteria on ozone layer depletion potential (ODP) and on ecotoxicity (Ecotox.), respectively.

449 **A)**

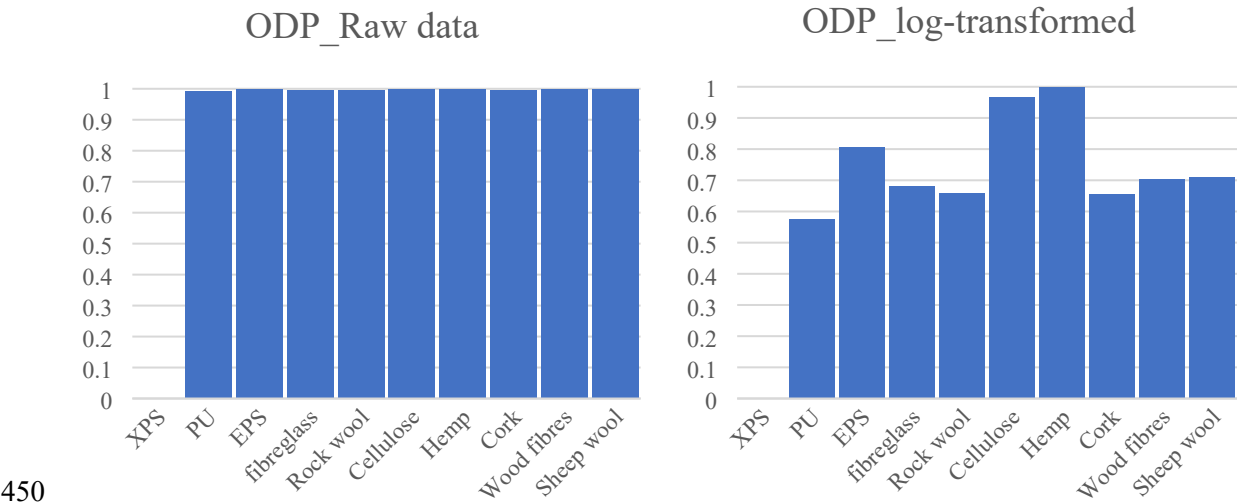

451 **B)**

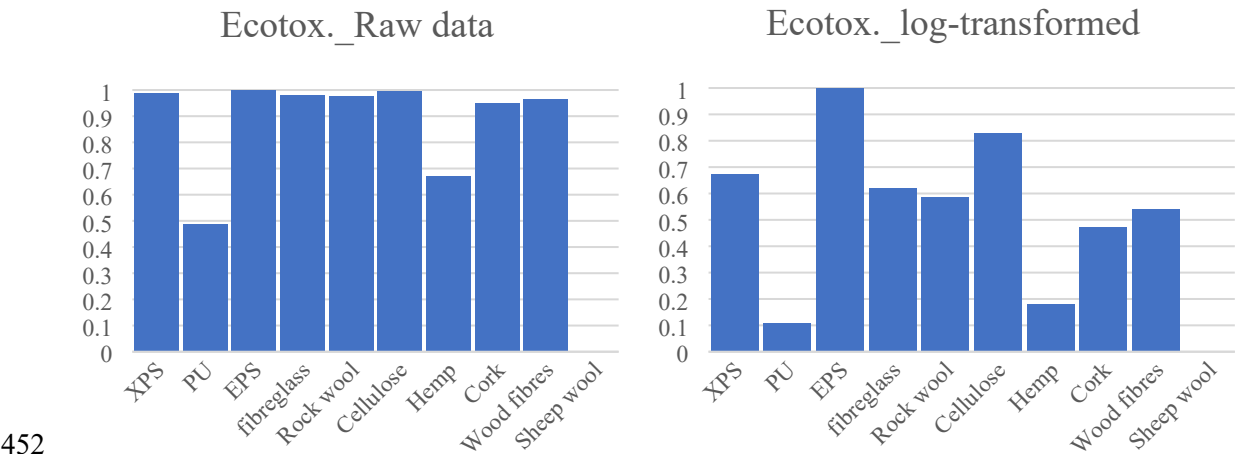

453 *Figure SI 6.1 Effect of log-transformation of the raw data on the distribution of the normalised data for*  
454 *the ozone layer depletion potential (A) and the ecotoxicity (B) criteria*

455 Tables SI 6.2.A, SI 6.2.B, and SI 6.2.C present the MAUT models based on log-transformed input data  
456 for the baseline scenario following the neutral approach, optimistic approach, and pessimistic approach,  
457 respectively.

458 *Table SI 6.2.A. MAUT model with transformed data for the baseline scenario - Neutral approach*

459 *Table SI 6.2.B. MAUT model with transformed data for the baseline scenario - Optimistic approach*

460 *Table SI 6.2.C. MAUT model with transformed data for the baseline scenario - Pessimistic approach*

461 **SI 7: MAUT models for the no compensation scenarios**

462 Tables SI 7.1, SI 7.2, and SI 7.3 present the MAUT models based on log-transformed input data for the  
463 scenario which does not allow for compensation between the criteria following the neutral approach,  
464 optimistic approach, and pessimistic approach, respectively.

465 *Table SI 7.1. MAUT model for the no compensation scenario - Neutral approach*

466 *Table SI 7.2. MAUT model for the no compensation scenario - Optimistic approach*

467 *Table SI 7.3. MAUT model for the no compensation scenario - Pessimistic approach*

468 **SI 8: MAUT models for the sequential decision-making scenario, by**  
469 **considering technical performance attributes first**

470 Tables SI 8.1, SI 8.2, and SI 8.3 present the results from the MAUT models based on log-transformed  
471 input data by considering criteria related to the technical performance only, following the neutral  
472 approach, optimistic approach, and pessimistic approach, respectively.

473 *Table SI 8.1. MAUT model for the sequential scenario - Performance ranking for the neutral approach*

474 *Table SI 8.2. MAUT model for the sequential scenario - Performance ranking for the optimistic*  
475 *approach*

476 *Table SI 8.3. MAUT model for the sequential scenario - Performance ranking for the pessimistic*  
477 *approach*

478 Tables SI 8.4, SI 8.5, and SI 8.6 present the results from the MAUT models based on sustainability  
479 criteria only for the five best alternatives regarding technical performance attributes according to the  
480 previous step, following the neutral approach, optimistic approach, and pessimistic approach,  
481 respectively.

482 *Table SI 8.4. MAUT model for the sequential scenario - Final ranking for the neutral approach*

483 *Table SI 8.5. MAUT model for the sequential scenario - Final ranking for the optimistic Scenario*

484 *Table SI 8.6. MAUT model for the sequential scenario - Final ranking for the pessimistic Scenario*

485 **SI 9: MAUT models for the sequential decision-making scenario, by**  
486 **considering sustainability attributes first**

487 Tables SI 9.1, SI 9.2, and SI 9.3 present the results from the MAUT models based on log-transformed  
488 input data by considering criteria related to sustainability only, following the neutral approach,  
489 optimistic approach, and pessimistic approach, respectively.

490 *Table SI 9.1. MAUT model for the sequential scenario - Sustainability ranking for the neutral approach*

491 *Table SI 9.2. MAUT model for the sequential scenario - Sustainability ranking for the optimistic*  
492 *approach*

493 *Table SI 9.3. MAUT model for the sequential scenario - Sustainability ranking for the pessimistic*  
494 *approach*

495 Tables SI 9.4, SI 9.5, and SI 9.6 present the results from the MAUT models based on technical  
496 performance criteria only for the five best alternatives regarding sustainability attributes according to  
497 the previous step, following the neutral approach, optimistic approach, and pessimistic approach,  
498 respectively.

499 *Table SI 9.4. MAUT model for the sequential scenario - Final ranking for the neutral approach*

500 *Table SI 9.5. MAUT model for the sequential scenario - Final ranking for the optimistic approach*

501 *Table SI 9.6. MAUT model for the sequential scenario - Final ranking for the pessimistic approach*

## 502 **References**

- 503 (1) Ishizaka, A.; Nemery, P. *Multi-Criteria Decision Analysis: Methods and Software*, 1st ed.; John  
504 Wiley & Sons, Ltd, 2013. <https://doi.org/10.1002/9781118644898>.
- 505 (2) Rowley, H. V.; Peters, G. M.; Lundie, S.; Moore, S. J. Aggregating Sustainability Indicators:  
506 Beyond the Weighted Sum. *J. Environ. Manage.* **2012**, *111*, 24–33.  
507 <https://doi.org/10.1016/j.jenvman.2012.05.004>.
- 508 (3) Malloy, T. F.; Sinsheimer, P. J.; Blake, A.; Linkov, I. Use of Multi-Criteria Decision Analysis in  
509 Regulatory Alternatives Analysis: A Case Study of Lead Free Solder. *Integr. Environ. Assess.*  
510 *Manag.* **2013**, *9* (4), 652–664. <https://doi.org/10.1002/ieam.1449>.
- 511 (4) Zheng, Z.; Peters, G. M.; Arp, H. P. H.; Andersson, P. L. Combining in Silico Tools with  
512 Multicriteria Analysis for Alternatives Assessment of Hazardous Chemicals: A Case Study of  
513 Decabromodiphenyl Ether Alternatives. *Environ. Sci. Technol.* **2019**, *53* (11), 6341–6351.  
514 <https://doi.org/10.1021/acs.est.8b07163>.
- 515 (5) Zheng, Z.; Arp, H. P. H.; Peters, G.; Andersson, P. L. Combining In Silico Tools with  
516 Multicriteria Analysis for Alternatives Assessment of Hazardous Chemicals: Accounting for the  
517 Transformation Products of decaBDE and Its Alternatives. *Environ. Sci. Technol.* **2021**, *55* (2),  
518 1088–1098. <https://doi.org/10.1021/acs.est.0c02593>.
- 519 (6) van Dijk, J.; Figuière, R.; Dekker, S. C.; van Wezel, A. P.; Cousins, I. T. Managing PMT/vPvM  
520 Substances in Consumer Products through the Concepts of Essential-Use and Functional  
521 Substitution: A Case-Study for Cosmetics. *Environ. Sci. Process. Impacts* **2023**, *25* (6), 1067–  
522 1081. <https://doi.org/10.1039/D3EM00025G>.
- 523 (7) Figuière, R.; Miaz, L.; Savvidou, E.; Cousins, I. Database of Alternatives to Persistent, Mobile  
524 and Toxic (PMT) Substances, and to per- and Polyfluoroalkyl Substances (PFAS)., 2024.  
525 <https://doi.org/10.5281/zenodo.10852739>.
- 526 (8) Schiavoni, S.; D'Alessandro, F.; Bianchi, F.; Asdrubali, F. Insulation Materials for the Building  
527 Sector: A Review and Comparative Analysis. *Renew. Sustain. Energy Rev.* **2016**, *62*, 988–1011.  
528 <https://doi.org/10.1016/j.rser.2016.05.045>.
- 529

530

531
